# Supplementary material for: A DNA-Launched Nanoparticle Vaccine Elicits CD8+ T-cell Immunity to Promote In Vivo Tumor Control
Source: Oxford University Press journal article supplement (doi:10.1158/2326-6066.cir-20-0061), 2020-09-10
Supplement: 23266066cir200061-sup-235917_4_supp_6468337_qf2mt2.docx [file 23266066cir200061-sup-235917_4_supp_6468337_qf2mt2.docx]

**DNA-launched nanoparticle vaccine elicits CD8+ T-cell immunity to promote in vivo tumor control**

Supplementary Information

**Authors:** Ziyang Xu1,2, Neethu Chokkalingam1, Edgar Tello-Ruiz1, Megan C. Wise3, Mamadou Bah1, Susanne Walker1, Nicholas Tursi1,Paul D. Fisher3, Katherine Schultheis3, Kate E. Broderick3, Laurent M. Humeau3, Daniel W. Kulp1* and David B. Weiner1*.

**Affiliations:**

1 The Vaccine and Immunotherapy Center, Wistar Institute, Philadelphia, PA 19104, United States

2 Department of Pharmacology, Perelman School of Medicine, University of Pennsylvania, Philadelphia, PA 19104, United States

3 Inovio Pharmaceuticals, Plymouth Meeting, PA 19422, United States

* Correspondence to: [dweiner@wistar.org](mailto:dweiner@wistar.org) and [dwkulp@wistar.org](mailto:dwkulp@wistar.org)





**Supplementary Figure S1.** Comparison of immune responses induced by DLnano_LS_GT8 versus protein eOD-GT8-60mer or DLnano_LS_HA(NC99) versus HA(NC99)-60mer in BALB/c mice. Mice were vaccinated twice three weeks apart and euthanized two weeks post the second vaccination for cellular analysis. **a.** Layout of all plasmids used in this study. **b-d.** Immune responses induced by vaccination with either 25ug of DLnano_LS_GT8 (with electroporation) or 10ug protein eOD-GT8-60mer adjuvanted with either RIBI, 50ug poly (I:C) or 20ug CpG ODN (without electroporation). **b.** IFNγ CD8+ T-cell responses induced to the GT8 domain by ICS analysis. **c.** Total T-cell responses induced to the GT8 domain by IFNγ ELIspot analyses. **d.** IFNγ CD4+ T-cell responses induced to the LS domain by ICS analysis. **e-h.** Immune responses induced by vaccination with either 50ug of DLnano_LS_GT8 (with electroporation) or 50ug RIBI-adjuvanted protein eOD-GT8-60mer (without electroporation). **e.** IFNγ CD8+ T-cell responses induced to the GT8 domain by ICS analysis. **f.** Total T-cell responses induced to the GT8 domain by IFNγ ELIspot analyses. **g.** IFNγ CD4+ T-cell responses induced to the LS domain by ICS analysis. **h.** Humoral responses induced to the GT8 by ELISA analysis. **i-k.** Immune responses induced by vaccination with either 25ug of DLnano_LS_GT8 with or without electroporation, or 10ug RIBI-adjuvanted protein eOD-GT8-60mer with or without electroporation. **i.** Humoral responses induced by DLnano_LS_GT8 (with or without EP) to the GT8 by ELISA analysis. **j.** Humoral responses induced by protein eOD-GT8-60mer (with or without EP) to the GT8 by ELISA analysis. **k.** IFNγ CD8+ T-cell responses induced to the GT8 domain by ICS analysis.**l.** CD4+ IFNγ responses to the LS domain induced by DLnano_LS_HA(NC99), HA(NC99)-60mer or in naïve mice. **m.** IFNγ ELIspot images for overall T-cell responses to the HA domain induced by DLnano_LS_HA(NC99), HA(NC99)-60mer or in naïve mice. Two independent experiments were performed for each panel with similar observations. Each group includes five mice; each dot represents an animal; error bar represents standard deviation; arrow below the plot represents an immunization; two-tailed Mann-Whitney Rank Test used to compare groups; p-values were adjusted for multiple comparison where appropriate; *, p-value<0.05.





**Supplementary Figure S2.** Characterization of muscle infiltrating APC induced by DNA or protein vaccination. **a.** Immunofluorescence staining for cleaved caspase 3 (red) or nuclei (blue) for muscle sections from naïve mice or those treated with protein eOD_GT8-60mer (with or without EP) or DLnano_LS_GT8 (with or without EP) harvested four d.p.i. **b.** Time course immunofluorescence images showing cleaved caspase 3 expression (red) in muscle tissue transfected with DLnano_LS_GT8 with EP over time; images from two mice were shown at each timepoint; nuclei staining with DAPI is shown in blue. **c** and **d.** Serum LDH and CK enzymatic activity in mice immunized with DLnano_LS_GT8, RIBI adjuvanted protein eOD-GT8-60mer or untreated mice following injection. **e.** Flow plot for determination of macrophage polarization (M1 versus M2) by staining CD11b+F4/80+ populations with CD206 and CD11c. **f.** Frequencies of M1 versus M2 macrophages in the muscles as determined by flow four days post DLnano_LS_GT8 vaccination. **g.** Flow plot by VRC01-FITC staining for determination of GT8-uptake in muscle macrophages from naïve mice, or mice treated with protein eOD-GT8-60mer or DLnano_LS_GT8 seven d.p.i. **h.** Flow plots for splenic CD11c+MHC Class II+ DC populations one day upon IV treatment of clodrosome or control encapsosome. **i.** Flow plots for splenic CD11b+F4/80+ macrophage populations one day upon IV treatment of clodrosome or control encapsosome. **j.** Comparison for changes in frequencies of splenic macrophages and DCs in Naïve mice upon IV treatment of clodrosome or control encapsosome. **k.** Humoral responses to GT8 in naïve mice or C57BL/6 mice or BATF3KO mice vaccinated with 25ug DLnano_LS_GT8 plus EP. Mice were vaccinated once and euthanized two weeks post vaccination. One independent experiment was performed for each panel. Each group includes five mice in **c**-**k**; each dot represents an animal; error bar represents standard deviation; arrow below the plot represents an immunization; two-tailed Mann-Whitney Rank Test used to compare groups; p-values were adjusted for multiple comparison where appropriate; *, p-value<0.05.





**Supplementary Figure S3.** Characterization of CD8+ T-cell responses induced by DLnano_LS_Trp2188 and DLnano_LS_Gp10025. **a.** SEC trace for designed LS_Gp10025-60mer. **b.** nsEM image of SEC purified LS_Gp10025-60mer nanoparticles. **c.** VRC01 binding of SEC purified GT8-monomer, GT8-60mer, Trp2-60mer and Gp100-60mer by an ELISA assay. **d.** Comparison of CD8+ IFNγ T-cell responses to both Trp2188 and Gp10025 peptide in naïve C57BL/6 mice or mice immunized twice two weeks apart with 10ug of both DLmono_Gp10025 and DLnano_LS_Trp2188 or DLnano_LS_Gp10025 and DLnano_LS_Trp2188. Mice were euthanized two weeks post the second vaccination for cellular analysis. **e.** B16-F10 challenge survival curves in the therapeutic model. C57BL/6 mice received subcutaneous implantation of 105 B16-F10 cells and then received treatment three days post tumor-inoculation, followed by weekly treatments for a total of four doses. Five groups of mice received either (1) 20ug pVAX backbone alone, (2) 200ug anti-PD1 antibody alone, (3) 10ug DLnano_LS_Trp2188 and 10ug DLnano_LS_Gp10025 alone, (4) 10ug DLmono_Trp2188,10ug DLmono_Gp10025 and 200ug anti-PD1 antibody, or (5) 10ug DLnano_LS_Trp2188,10ug DLnano_LS_Gp10025 and 200ug anti-PD1 antibody for each treatment. **f** through **i**. Comparison of the immunogenicity of DLnano-vaccines versus CpG adjuvanted peptide vaccines in mice. Mice were vaccinated twice with either 10ug DLnano_LS_Trp2188/DLnano_LS_Gp10025 or 10ug Trp2188/Gp10025 peptide adjuvanted with 20ug CpG ODN two weeks apart and euthanized two weeks post the second vaccination. **f.** Comparison of CD8+ IFNγ T-cell responses to Trp2188 peptide in naïve mice or mice immunized with either DLnano_LS_Trp2188 or CpG adjuvanted Trp2188 peptide by the ICS assay. **g.** Comparison of CD8+ IFNγ T-cell responses to Gp10025 peptide in naïve mice or mice immunized with either DLnano_LS_Gp10025 or CpG adjuvanted Gp10025 peptide by the ICS assay. **h**. and **i**. Comparison of IFNγ T-cell responses to Trp2188 or Gp10025 peptides in naïve mice or mice immunized with either DLnano_LS_Trp2188/DLnano_LS_Gp10025 or CpG adjuvanted Trp2188/Gp10025 peptides by the ELIspot assay. **j, k** and **l.** Induced IFNγ+, IFNγ+CD107a+, or IFNγ+TNFα+IL-2+ CD8+ T-cell responses to Gp10025 in naïve tumor-free mice or B16-F10 bearing mice that received anti-PD1 treatment alone, or anti-PD1 treatment in combination with 4ug each of RIBI-adjuvanted protein Trp2188 and Gp10025-60mer or 10ug each of DLnano_LS_Trp2188 and DLnano_LS_Gp10025.**m.** Tumor growths in mice that first received two vaccinations two weeks apart of pVAX vector, or a combination of DLnano_LS_Trp2188 and DLnano_LS_Gp10025. The mice then received either anti-mouse CD8 antibody or Rat IgG2b isotype control antibody and were then challenged with 105 B16-F10-Luc cells seven days post the second immunization.One independent experiment was performed for each panel. Each group includes five mice; each dot represents an animal; error bar represents standard deviation; arrow below the plot represents an immunization; two-tailed Mann-Whitney Rank Test used to compare groups; log-rank test used to compare survival between two groups; *, p-value<0.05; **, p-value<0.005.





**Supplementary Figure S4.** Gating strategy for intracellular cytokine staining. Singlets were identified, followed by leukocytes, live CD3+ cells, CD4+ and CD8+ cells. IFNγ+ CD4+ or CD8+ cells were then gated as demonstrated.

**Supplemental Table S1**. Protein sequences of constructs

1. DLnano_LS_GT8

MDWTWILFLVAAATRVHSMQIYEGKLTAEGLRFGIVASRANHALVDRLVEGAIDAIVRHGGREEDITLVRVCGSWEIPVAAGELARKEDIDAVIAIGVLCRGATPSFDYIASEVSKGLADLSLELRKPITFGVITADTLEQAIEAAGTCHGNKGWEAALCAIEMANLFKSLRGGSGGSGGSGGSGGGDTITLPCRPAPPPHCSSNITGLILTRQGGYSNDNTVIFRPSGGDWRDIARCQIAGTVVSTQLFLNGSLAEEEVVIRSEDWRDNAKSICVQLNTSVEINCTGAGHCNISRAKWNNTLKQIASKLREQYGNKTIIFKPSSGGDPEFVNHSFNCGGEFFYCDSTQLFNSTWFNST

1. DLnano_LS_HA(NC99)

MDWTWILFLVAAATRVHSMQIYEGKLTAEGLRFGIVASRANHALVDRLVEGAIDAIVRHGGREEDITLVRVCGSWEIPVAAGELARKEDIDAVIAIGVLCRGATPSFDYIASEVSKGLADLSLELRKPITFGVITADTLEQAIEAAGTCHGNKGWEAALCAIEMANLFKSLRGGSGGSGGSGGSGGGAPLQLGNCSVAGWILGNPECELLISKESWSYIVETPNPENGTCFPGYFADYEELREQLSSVSSFERFEIFPKESSWPNHTVTGVSASCSHNGKSSFYRNLLWLTGKNGLYPNLSKSYVNNKEKEVLVLWGVHHPPNIGNQRALYHTENAYVSVVSSHYSRRFTPEIAKRPKVRDQEGRINYYWTLLEPGDTIIFEANGNLIAPWYAFALSRG

1. DLnano_LS_Gp10025

MDWTWILFLVAAATRVHSMQIYEGKLTAEGLRFGIVASRANHALVDRLVEGAIDAIVRHGGREEDITLVRVCGSWEIPVAAGELARKEDIDAVIAIGVLCRGATPSFDYIASEVSKGLADLSLELRKPITFGVITADTLEQAIEAAGTCHGNKGWEAALCAIEMANLFKSLRGGSGGSGGSGGSGGGDTITLPCRPAPPPHCSSNITGLILTRQGGYSNDNTVIFRPSGGDWRDIARCQIAGTVVSTQLFLNGSLAEEEVVIRSEDWRDNAKSICVQLNTSVEINCTGAGHCNISRAKWDNTLKQIASKLREQYGNKTIIFKPSSGGDPEFVNHSFNCGGEFFYCDSTQLFDSTWFDSTGGSGSGGGSEGPRNQDWL

1. DLnano_LS_Trp2188

MDWTWILFLVAAATRVHSMQIYEGKLTAEGLRFGIVASRANHALVDRLVEGAIDAIVRHGGREEDITLVRVCGSWEIPVAAGELARKEDIDAVIAIGVLCRGATPSFDYIASEVSKGLADLSLELRKPITFGVITADTLEQAIEAAGTCHGNKGWEAALCAIEMANLFKSLRGGSGGSGGSGGSGGGDTITLPCRPAPPPHCSSNITGLILTRQGGYSNDNTVIFRPSGGDWRDIARCQIAGTVVSTQLFLNGSLAEEEVVIRSEDWRDNAKSICVQLNTSVEINCTGAGHCNISRAKWDNTLKQIASKLREQYGNKTIIFKPSSGGDPEFVNHSFNCGGEFFYCDSTQLFDSTWFDSTGGSGSGGGSSVYDFFVWL

1. DLmono_Gp10025

MDWTWILFLVAAATRVHSDTITLPCRPAPPPHCSSNITGLILTRQGGYSNDNTVIFRPSGGDWRDIARCQIAGTVVSTQLFLNGSLAEEEVVIRSEDWRDNAKSICVQLNTSVEINCTGAGHCNISRAKWDNTLKQIASKLREQYGNKTIIFKPSSGGDPEFVNHSFNCGGEFFYCDSTQLFDSTWFDSTGGSGSGGGSEGPRNQDWL

1. DLmono_Trp2188

MDWTWILFLVAAATRVHSDTITLPCRPAPPPHCSSNITGLILTRQGGYSNDNTVIFRPSGGDWRDIARCQIAGTVVSTQLFLNGSLAEEEVVIRSEDWRDNAKSICVQLNTSVEINCTGAGHCNISRAKWDNTLKQIASKLREQYGNKTIIFKPSSGGDPEFVNHSFNCGGEFFYCDSTQLFDSTWFDSTGGSGSGGGSSVYDFFVWL
